# Supplementary material for: Selective incorporation of functional dicarboxylates into zinc metal–organic frameworks
Source: Royal Society of Chemistry journal article supplement (doi:10.1039/c1cc10143a), 2011-01-01
Supplement: c1cc10143a.pdf [file c1cc10143a.pdf]

## Selective incorporation of functional dicarboxylates into zinc metal-organic frameworks

Andrew D. Burrows, Laura Fisher, Christopher Richardson and Sean P. Rigby

### Supplementary information

#### Synthesis of 2-iodo-1,4-benzenedicarboxylic acid

2-Iodo-1,4-benzenedicarboxylic acid ( $H_2bdc-I$ ) was prepared from 2-amino-1,4-benzenedicarboxylic acid *via* the diazonium salt.<sup>S1</sup>

#### Synthesis of $[Zn_4O(bdc-I)_3]$

2-Iodo-1,4-benzenedicarboxylic acid (0.100 g, 0.34 mmol) and  $Zn(NO_3)_2 \cdot 6H_2O$  (0.300 g, 1.0 mmol) were dissolved in DEF (20 cm<sup>3</sup>) in an Ace pressure tube (Aldrich Chemical Co.) and heated at 95 °C for 72 hours. The resulting pale yellow cubic crystals (0.200 g, 59 %) were separated by filtration and washed with fresh DEF. Found: C, 36.5; H, 4.44; N, 4.89 %. Calc. for  $C_{54}H_{75}I_3N_6O_{19}Zn_4$  ( $[Zn_4O(bdc-I)_3] \cdot 6DEF$ ): C, 37.0; H, 4.31; N, 4.79 %.

Powder diffraction patterns showed samples of  $[Zn_4O(bdc-I)_3]$  to have limited crystallinity, with the observed peaks matching those simulated from the X-ray crystal structure of  $[Zn_4O(bdc-Br)_3]$  (IRMOF-2). Single crystals did not diffract well enough for a complete structural determination to be carried out. However, determination of the unit cell confirmed the crystals were isostructural with  $[Zn_4O(bdc-Br)_3]$  (IRMOF-2).

The TGA trace for  $[Zn_4O(bdc-I)_3]$  is shown in Figure S1, alongside the trace for  $[Zn_4O(bdc-Br)_3]$ . The mass loss of approximately 30 % between room temperature and 350 °C is consistent with the loss of 5DEF molecules (calc. 30.6 %).

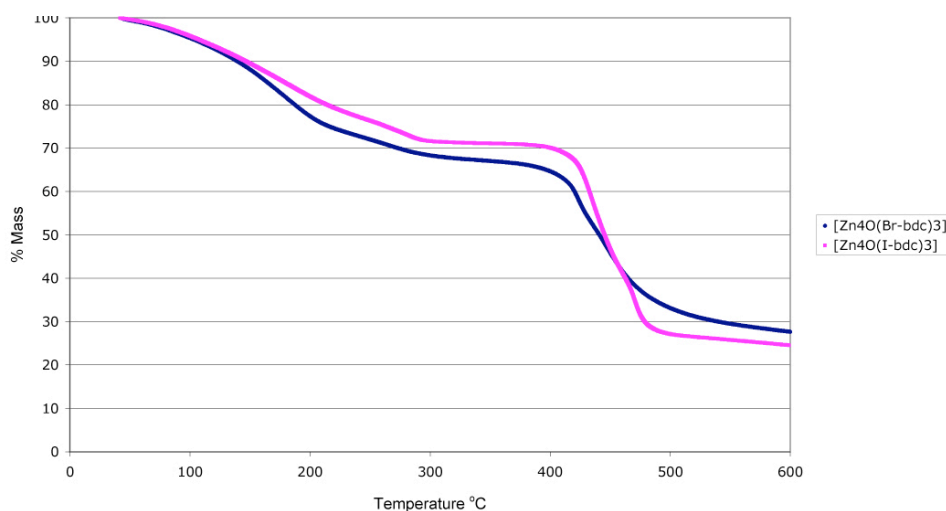

**Fig. S1.** Thermogravimetric analyses for  $[Zn_4O(bdc-I)_3]$  and  $[Zn_4O(bdc-Br)_3]$ .

The nitrogen adsorption/desorption isotherm for an activated samples of  $[\text{Zn}_4\text{O}(\text{bdc-I})_3]$  is shown in Figure S2. The BET surface area for  $[\text{Zn}_4\text{O}(\text{bdc-I})_3]$ , calculated using the standard BET range ( $0.05 < P/P_0 < 0.3$ ) is  $1096 \text{ m}^2 \text{ g}^{-1}$ .

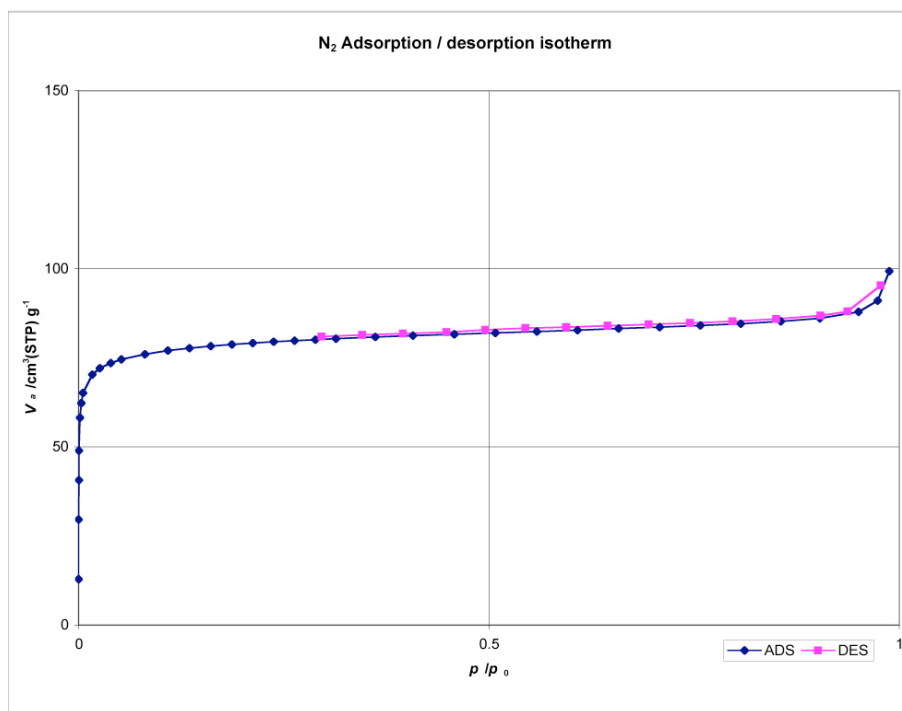

**Fig. S2.** Nitrogen adsorption/desorption isotherm for  $[\text{Zn}_4\text{O}(\text{bdc-I})_3]$ .

### Synthesis of $[\text{Zn}_4\text{O}(\text{bdc})_{3-x}(\text{bdc-I})_x]$

2-Iodo-1,4-benzenedicarboxylic acid and 1,4-benzenedicarboxylic acid were combined in different ratios (total 0.112 mmol) with  $\text{Zn}(\text{NO}_3)_2 \cdot 6\text{H}_2\text{O}$  (0.100 g, 0.34 mmol), dissolved in DEF ( $5 \text{ cm}^3$ ) in an Ace pressure tube (Aldrich Chemical Co.) and heated at  $95 \text{ }^\circ\text{C}$  for 170 hours. The resulting pale yellow cubic crystals were separated by filtration and washed with fresh DEF. Yield 49-61 %.

The MOFs were digested by sonication in  $1.5 \text{ cm}^3$  of a solution of  $\text{DMSO-}d_6$  and  $0.2 \text{ cm}^3$  of a DCI solution prepared by dissolving  $0.023 \text{ cm}^3$  of 35 % DCI/ $\text{D}_2\text{O}$  solution in  $1 \text{ cm}^3$  DMSO. This solution was used directly for  $^1\text{H}$  NMR, and was diluted by a factor of 10 in ethanol for mass spectrometry. In the  $^1\text{H}$  NMR spectra, the ratio of the dicarboxylic acids was determined through a comparison of the integrals for the doublet observed at  $\delta$  7.75 ppm (1H,  $\text{H}_2\text{bdc-I}$ ) and the singlet observed at  $\delta$  8.05 ppm (4H,  $\text{H}_2\text{bdc}$ ).

ESI-MS (negative mode):  $m/z$  165.0183 (calc. 165.0188 for  $[\text{Hbdc}]^-$ ), 290.9151 (calc. 290.9154 for  $[\text{Hbdc-I}]^-$ ).

Representative X-ray powder diffraction patterns from this series of MC-MOFs are shown in Figure S3.

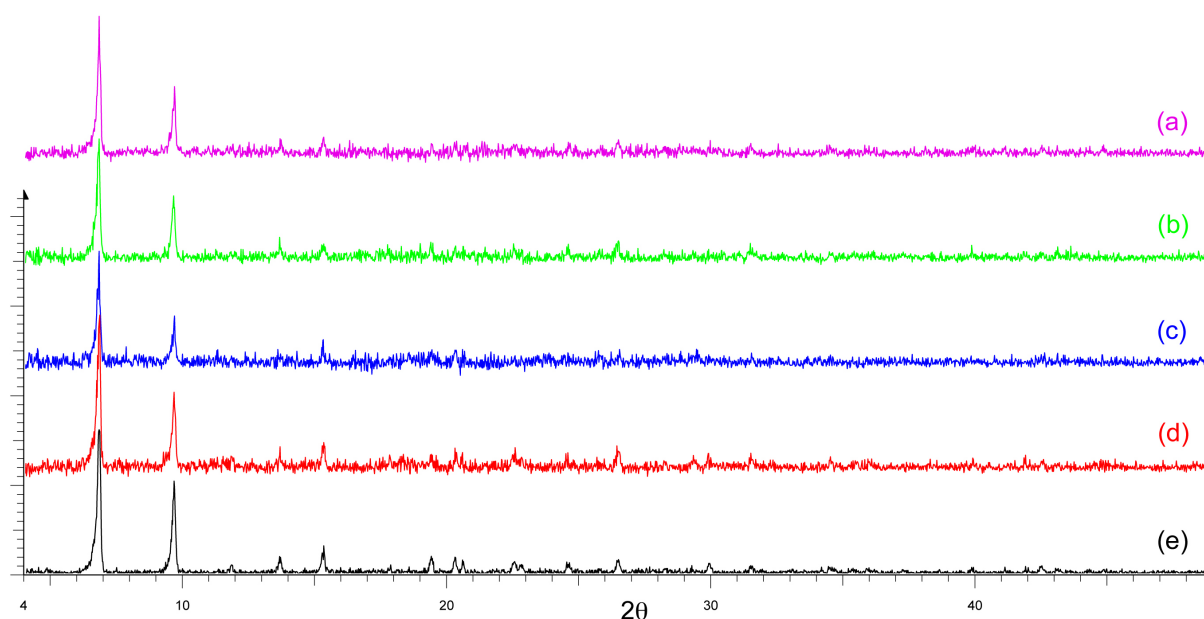

**Fig. S3.** Powder X-ray diffraction patterns for (a)  $[\text{Zn}_4\text{O}(\text{bdc})_{1.19}(\text{bdc-I})_{1.81}]$ , (b)  $[\text{Zn}_4\text{O}(\text{bdc})_{1.78}(\text{bdc-I})_{1.22}]$ , (c)  $[\text{Zn}_4\text{O}(\text{bdc})_{0.72}(\text{bdc-I})_{2.28}]$ , (d)  $[\text{Zn}_4\text{O}(\text{bdc})_{1.57}(\text{bdc-I})_{1.43}]$  and (e)  $[\text{Zn}_4\text{O}(\text{bdc})_{2.53}(\text{bdc-I})_{0.47}]$ .

### Synthesis of $[\text{Zn}_4\text{O}(\text{bdc})_{3-x}(\text{bdc-Br})_x]$

2-Bromo-1,4-benzenedicarboxylic acid and 1,4-benzenedicarboxylic acid were combined in different ratios (total 0.112 mmol) with  $\text{Zn}(\text{NO}_3)_2 \cdot 6\text{H}_2\text{O}$  (0.100 g, 0.34 mmol), dissolved in DEF (5 cm<sup>3</sup>) in an Ace pressure tube (Aldrich Chemical Co.) and heated at 95 °C for 170 hours. The resulting colourless cubic crystals were separated by filtration and washed with fresh DEF. Yield 42-59 %.

The MOFs were digested by sonication in 1.5 cm<sup>3</sup> of a solution of  $\text{DMSO-}d_6$  and 0.2 cm<sup>3</sup> of a DCI solution prepared by dissolving 0.023 cm<sup>3</sup> of 35 % DCI/D<sub>2</sub>O solution in 1 cm<sup>3</sup> DMSO. This solution was used directly for <sup>1</sup>H NMR, and was diluted by a factor of 10 in ethanol for mass spectrometry. In the <sup>1</sup>H NMR spectra, the ratio of the dicarboxylic acids was determined through a comparison of the integrals for the doublet observed at δ 7.83 ppm (1H, H<sub>2</sub>bdc-Br) and the singlet observed at δ 8.05 ppm (4H, H<sub>2</sub>bdc).

ESI-MS (negative mode): *m/z* 165.0191 (calc. 165.0188 for  $[\text{Hbdc}]^-$ ), 242.9293 (calc. 242.9275 for  $[\text{Hbdc-Br}]^-$ ).

Representative X-ray powder diffraction patterns from this series of MC-MOFs are shown in Figure S4.

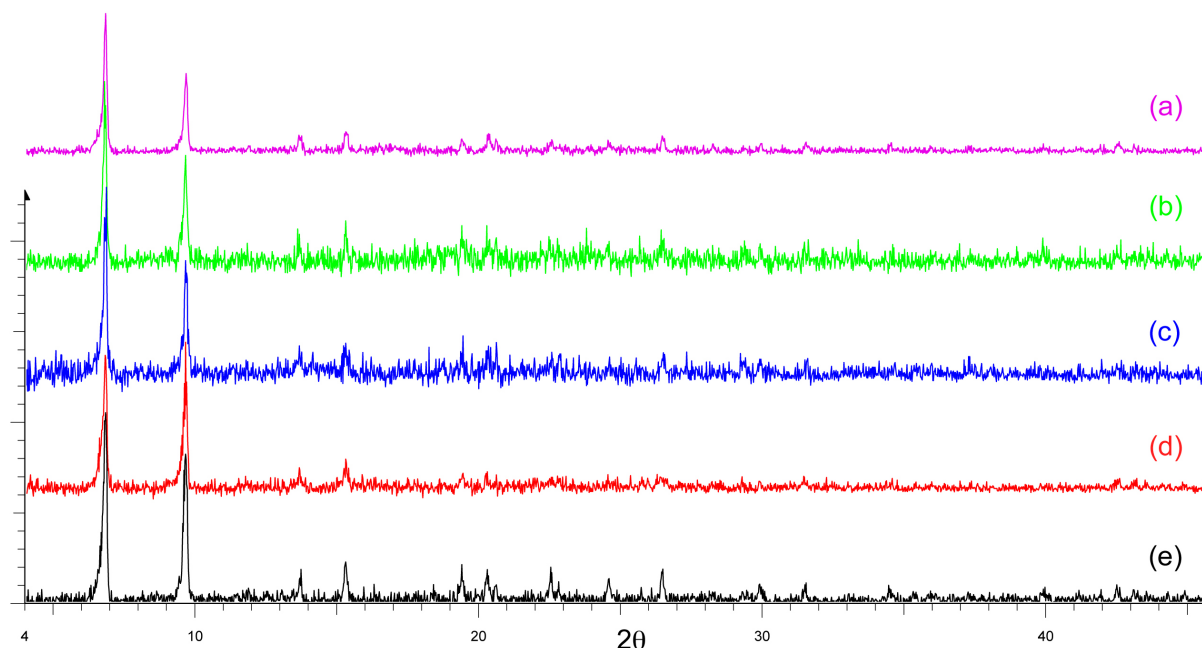

**Fig. S4.** Powder X-ray diffraction patterns for (a)  $[\text{Zn}_4\text{O}(\text{bdc})_{1.45}(\text{bdc-Br})_{1.55}]$ , (b)  $[\text{Zn}_4\text{O}(\text{bdc})_{2.15}(\text{bdc-Br})_{0.85}]$ , (c)  $[\text{Zn}_4\text{O}(\text{bdc})_{1.13}(\text{bdc-Br})_{1.87}]$ , (d)  $[\text{Zn}_4\text{O}(\text{bdc})_{1.87}(\text{bdc-Br})_{1.13}]$  and (e)  $[\text{Zn}_4\text{O}(\text{bdc})_{2.78}(\text{bdc-Br})_{0.22}]$ .

### Synthesis of $[\text{Zn}_4\text{O}(\text{bdc-Br})_{3-x}(\text{bdc-I})_x]$

2-Bromo-1,4-benzenedicarboxylic acid and 2-iodo-1,4-benzenedicarboxylic acid were combined in different ratios (total 0.112 mmol) with  $\text{Zn}(\text{NO}_3)_2 \cdot 6\text{H}_2\text{O}$  (0.100 g, 0.34 mmol), dissolved in DEF (5 cm<sup>3</sup>) in an Ace pressure tube (Aldrich Chemical Co.) and heated at 95 °C for 170 hours. The resulting pale yellow cubic crystals were separated by filtration and washed with fresh DEF. Yield 41-51 %.

The MOFs were digested by sonication in 1.5 cm<sup>3</sup> of a solution of DMSO-*d*<sub>6</sub> and 0.2 cm<sup>3</sup> of a DCI solution prepared by dissolving 0.023 cm<sup>3</sup> of 35 % DCI/D<sub>2</sub>O solution in 1 cm<sup>3</sup> DMSO. This solution was used directly for <sup>1</sup>H NMR, and was diluted by a factor of 10 in ethanol for mass spectrometry. In the <sup>1</sup>H NMR spectra, the ratio of the dicarboxylic acids was determined through a comparison of the integrals for the doublet observed at δ 7.83 ppm (1H, H<sub>2</sub>bdc-Br) and the doublet observed at δ 7.78 ppm (1H, H<sub>2</sub>bdc-I).

ESI-MS (negative mode): *m/z* 242.9279 (calc. 242.9293 for  $[\text{Hbdc-Br}]^-$ ), 290.9154 (calc. 290.9145 for  $[\text{Hbdc-I}]^-$ ).

Representative X-ray powder diffraction patterns from this series of MC-MOFs are shown in Figure S5.

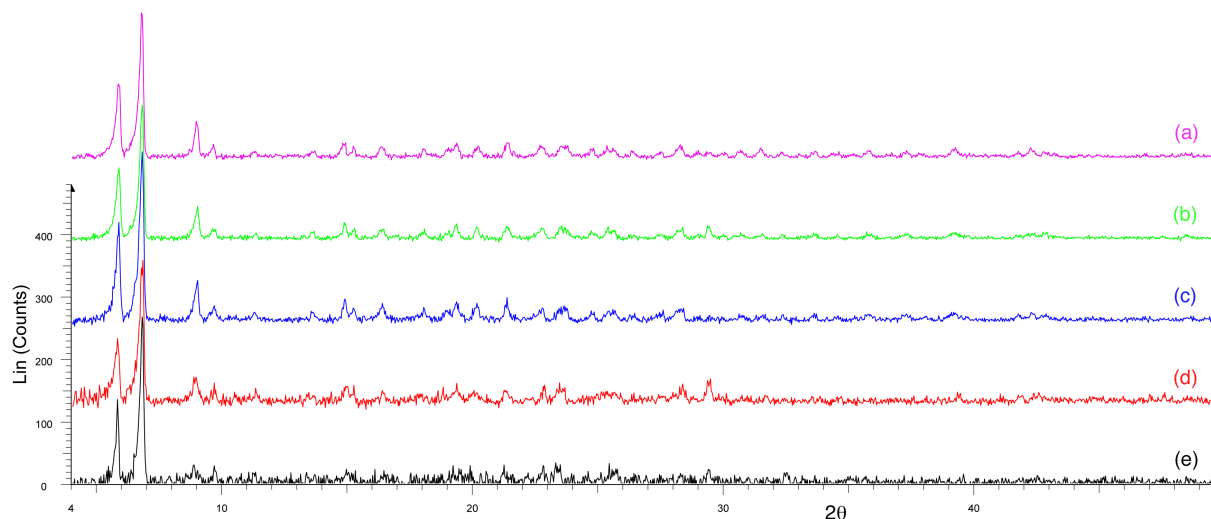

**Fig. S5.** Powder X-ray diffraction patterns for (a)  $[\text{Zn}_4\text{O}(\text{bdc-Br})_{2.58}(\text{bdc-I})_{0.42}]$ , (b)  $[\text{Zn}_4\text{O}(\text{bdc-Br})_{2.13}(\text{bdc-I})_{0.87}]$ , (c)  $[\text{Zn}_4\text{O}(\text{bdc-Br})_{1.47}(\text{bdc-I})_{1.53}]$ , (d)  $[\text{Zn}_4\text{O}(\text{bdc-Br})_{0.93}(\text{bdc-I})_{2.07}]$  and (e)  $[\text{Zn}_4\text{O}(\text{bdc-Br})_{0.45}(\text{bdc-I})_{2.55}]$ .

## Reference

- S1. A. Kommreddy, M. S. Bowsher, M. R. Gunna, K. Botha and T. K. Vinod, *Tetrahedron Lett.*, 2008, **49**, 4378.
